# Supplementary material for: Carbon-supported Pt–Ru nanoparticles prepared in glyoxylate-reduction system promoting precursor–support interaction
Source: Royal Society of Chemistry journal article supplement (doi:10.1039/b923153f), 2010-01-01
Supplement: b923153f.pdf [file b923153f.pdf]

## Supporting Information

### Carbon-supported Pt–Ru nanoparticles prepared in glyoxylate-reduction system promoting precursor-support interaction

Ki Chul Park,<sup>\*a</sup> In Young Jang,<sup>a</sup> Winadda Wongwiriyan,<sup>a</sup> Shingo Morimoto,<sup>b</sup> Yong Jung Kim,<sup>c</sup> Yong Chae Jung,<sup>a</sup> Tomohiro Toya<sup>d</sup> and Morinobu Endo<sup>\*a,c</sup>

<sup>a</sup> *Department of Electrical and Electronic Engineering,* <sup>c</sup> *Institute of Carbon Science and Technology (ICST), and* <sup>d</sup> *Department of Mechanical Systems Engineering,*

*Shinshu University, Wakasato, Nagano 380-8553, Japan, and*

<sup>b</sup> *Nagano Techno Foundation, 1-18-1 Wakasato, Nagano 380-0928, Japan.*

*E-mail: kimuram@endomoribu.shinshu-u.ac.jp (K. C. Park); endo@endomoribu.shinshu-u.ac.jp (M. Endo); Fax: +81-26-269-5667; Tel: +81-26-269-5656*

#### INDEX:

**S-1.** Supplementary data of XPS analysis

**S-2.** Supplementary data for the electrochemical characterization of the catalysts

## S-1. Supplementary data of XPS analysis

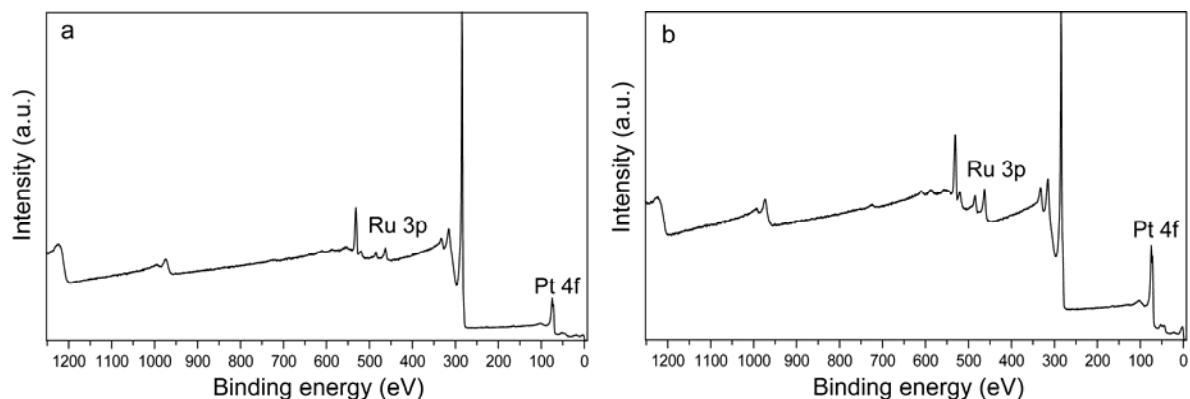

**Fig. S1** Survey-scan XPS spectra of the Pt–Ru/C catalysts prepared by glyoxylate reduction. (a) **G20**, (b) **G60**. The survey-scan spectra show no peak of Cl 3p core levels at 198 eV, which indicates no remaining Cl<sup>−</sup> from the precursor salts.

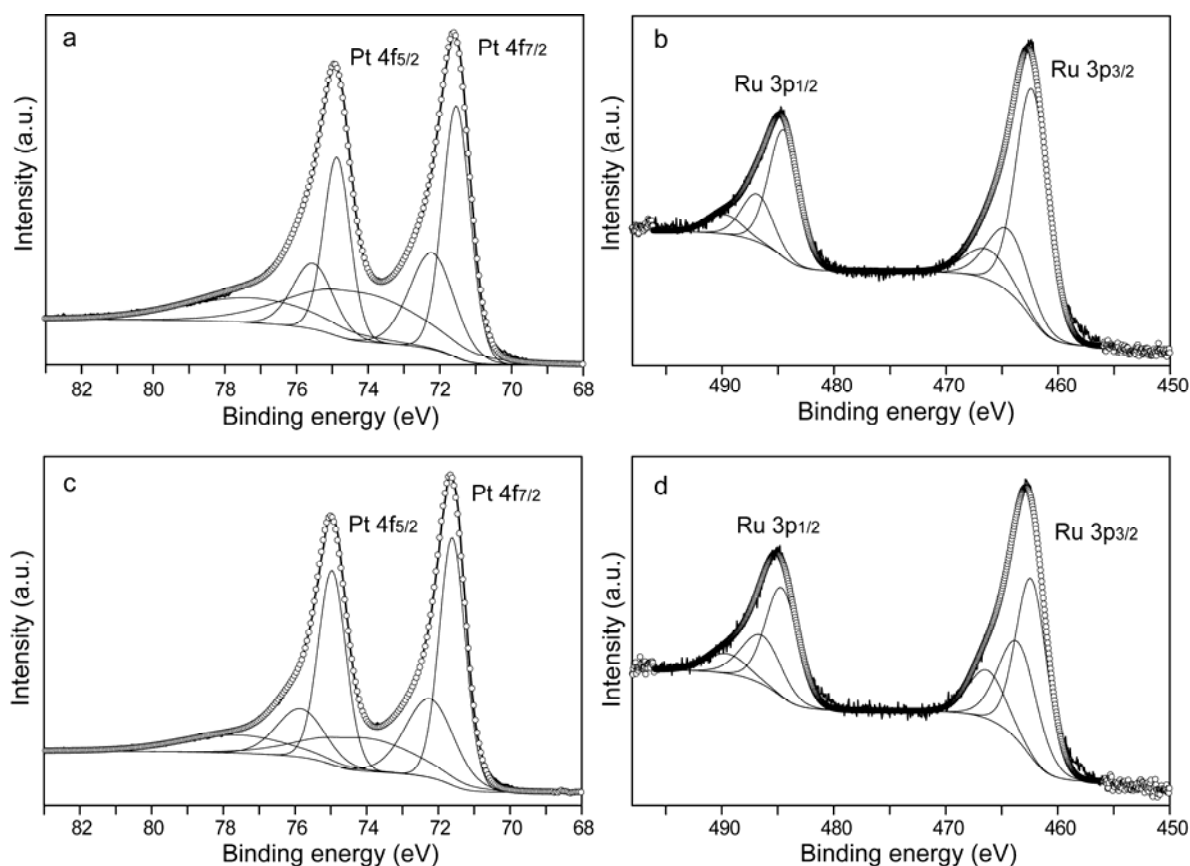

**Fig. S2** XPS core-level spectra for the Pt 4f and Ru 3p regions of the 60-wt.% Pt–Ru catalysts supported on Vulcan XC-72R. (a) Pt 4f and (b) Ru 3p regional spectra of **G60**. (c) Pt 4f and (d) Ru 3p regional spectra of **N60**. Bold line: raw spectra, thin line: component peaks, open circle: the synthetic spectra of the component peaks.

**Table S1** Average binding energies (BE) of the component peaks obtained from the Pt 4f and Ru 3p XPS spectra of the Pt–Ru/C catalysts prepared by using glyoxylate reduction and NaBH<sub>4</sub> reduction

| Atom | Orbital/spin | BE (eV)   |           |           |           | Assignment          |
|------|--------------|-----------|-----------|-----------|-----------|---------------------|
|      |              | G20       | N20       | G60       | N60       |                     |
| Pt   | 4f7/2        | 71.6±0.1  | 71.6±0.0  | 71.5±0.0  | 71.5±0.1  | Pt(0)               |
|      | 4f5/2        | 74.9±0.1  | 75.0±0.0  | 74.9±0.1  | 74.9±0.1  |                     |
|      | 4f7/2        | 72.3±0.2  | 72.3±0.1  | 72.2±0.1  | 72.3±0.2  | Pt(II)              |
|      | 4f5/2        | 75.8±0.3  | 75.6±0.1  | 75.6±0.3  | 75.6±0.2  |                     |
|      | 4f7/2        | 73.9±0.3  | 74.5±0.3  | 74.1±0.5  | 74.5±0.5  | Pt(IV)              |
|      | 4f5/2        | 77.0±0.6  | 77.4±0.5  | 76.9±0.1  | 77.5±0.2  |                     |
| Ru   | 3p3/2        | 462.2±0.1 | 462.3±0.1 | 462.2±0.1 | 462.3±0.1 | Ru(0)               |
|      | 3p1/2        | 484.5±0.2 | 484.5±0.1 | 484.4±0.1 | 484.5±0.1 |                     |
|      | 3p3/2        | 464.2±0.3 | 463.9±0.1 | 463.9±0.4 | 463.7±0.2 | Ru(IV)              |
|      | 3p1/2        | 486.7±0.2 | 486.6±0.4 | 486.7±0.2 | 486.2±0.3 |                     |
|      | 3p3/2        | 466.5±0.7 | 466.2±0.6 | 466.2±0.1 | 466.6±0.3 | Ru(IV)<br>(hydrate) |
|      | 3p1/2        | 489.5±0.4 | 489.7±0.5 | 489.5±0.3 | 489.1±0.4 |                     |

Population for calculation: four samples in each catalyst

## S-2. Supplementary data for the electrochemical characterization of the catalysts

Fig. S3 shows the CV curves obtained in 0.5 mol L<sup>-1</sup> H<sub>2</sub>SO<sub>4</sub> aqueous solutions without methanol. The CV curves were recorded at the 20th sweep in the potential range from -0.15 up to 0.54 V (vs Ag/AgCl) in order to prevent Ru dissolution. All the current data were normalized to current densities (mA mg<sup>-1</sup>) by the metal amounts loaded to the working electrode. In Pt-Ru electrodes, the CV curve shows no simple potential-dependent distinction of hydrogen adsorption/desorption and double-layer regions due to the overlapping of ruthenium-hydroxide formation/reduction with the hydrogen and double-layer regions.<sup>1</sup> Therefore, the electrochemically active surface area of Pt-Ru catalysts cannot simply be evaluated from the overlapping hydrogen region of about -0.15–0.15 V. For this reason, we avoided estimating the active surface area. The underpotential deposition of atomic hydrogen is a structure-sensitive catalytic process for the lattice planes of Pt crystals.<sup>2</sup> Therefore, hydrogen adsorption/desorption ability would be influenced by the crystal structure of the Pt-Ru nanoparticles. As shown in Table 1 (see Article), however, there is no large difference between the lattice parameters of **G20** and **N20** due to the similar incorporation of Ru into fcc Pt crystals. It is therefore considered that the CV response at the overlapping hydrogen region (-0.15–0.15 V vs Ag/AgCl) would be more influenced by the structural and morphological factors of the nanoparticles and the prominent difference of surface composition, rather than crystallographic factors. The **G20** catalyst showed much higher current densities at the lower potential region of -0.15–0.07 V than at 0.07–0.3 V. As is well known, Ru does not contribute to the development of hydrogen adsorption/desorption peaks.<sup>3</sup> Therefore, the more developing peak at -0.15–0.07 V is attributed to the high Pt(0)/Ru ratio of **G20**. As for **G60**, **N20** and **N60**, the relative proportions of the current densities at 0.07–0.3 V to those at -0.15–0.07 V are larger than that of **G20**. This results from their high Ru/Pt(0) ratios, which increase the formation/reduction of ruthenium hydroxide species. The higher anodic and cathodic current densities for **G20** in the whole potential range reflect the structural and morphological advantages of the Pt-Ru nanoparticles. The high particle dispersion achieved in the **G20** catalyst would increase the exposed active sites, resulting in the increase of the current densities.

## References

1. H. A. Gasteiger, N. Marković, P. N. Ross, Jr. and E. J. Cairns, *J. Phys. Chem.*, 1993, **97**, 12020–12029;
2. H. Ogasawara and M. Ito, *Chem. Phys. Lett.*, 1994, **221**, 213–218; R. Gómez, J. M. Orts, B. Álvarez-Ruiz and J. M. Feliu, *J. Phys. Chem. B*, 2004, **108**, 228–238; J. Solla-Gullón, V. Montiel, A. Aldaz and J. Clavilier, *J. Electroanal. Chem.*, 2000, **491**, 69–77.
3. Y.-I. Yao, Y. Ding, L.-S. Ye and X.-H. Xia, *Carbon*, 2006, **44**, 61–66 ; M. Carmo, V. A. Paganin, J. M. Rosolen and E. R. Gonzalez, *J. Power Sources*, 2005, **142**, 169–176.

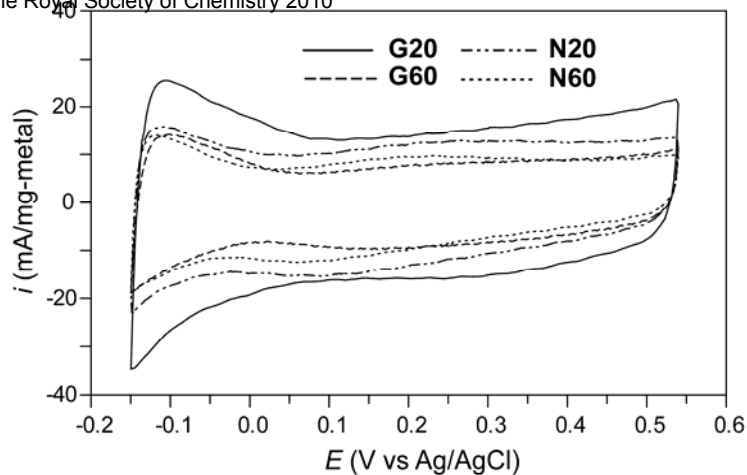

**Fig. S3** Cyclic voltammograms obtained in 0.5 mol L<sup>-1</sup> H<sub>2</sub>SO<sub>4</sub> solutions for the Pt-Ru/C catalysts prepared by glyoxylate reduction and NaBH<sub>4</sub> reduction. The data were recorded at room temperature with the sweep rate of 50 mV s<sup>-1</sup>. All the CV curves show the 20th cycle data in the potential sweep of -0.15–0.54 V vs Ag/AgCl.
